# Supplementary material for: Association of Sequence types, Antimicrobial Resistance and Virulence Genes in India isolates of Klebsiella pneumoniae: A Comparative Genomics Study
Source: Research Square preprint supplement (doi:10.21203/rs.3.rs-923160/v2), 2021-09-22
Supplement: Supplementary file 1 [file d3c06e43cdb3da44d62e0205.xlsx]

## Sheet: Sheet1
															Serotype
Strains	KL64	KL51	KL16	KL2	KL3	KL24	KL116	KL9	KL54	KL107	KL5	KL30	KL48	KL62	KL47	KL81	KL10	KL117	KL1	KL17	KL57	KL36	KL62	KL122	KL50	KL102	KL14	KL25	KL166
VBP1492
VBNK6
VBNK3
VBNK2
VBA6949
VBA3720
VBA2612
VB1347
U25
PVN-1
PMM475
PM12640
PM12530
PM11304
PM10818
PM9016
PM7109
PM5186
PM5070
PM1995
PM1842
PM1168
PM1134
PM716
PM565
PM138
PL1-RCS238
P-7335
MRK9
ME30
KpIMS38
KPF39
KP26
JNM10C3
KBG6.2
JNM8C2
IR27
HPCN22
HPCN17
HPCN5
H62
H53
EN5339
EN5275
EN5218
EN5199
EN5153
CRKP1
CMC_VB35168
CMC_VB34444
CMC_VB13923
CMC_VB6753
CMC_VB5505
CMC_VB4175
C6
C12
C8
C7
C4
C1
BP19451
BP19430
BP11474
BP10616
BP5065
BP3636
BP1722
BP737
BP327
BA41763
BA39950
BA39824
BA39649
BA39576
BA38014
BA37787
BA37082
BA36749
BA36541
BA34974
BA34918
BA33875
BA33560
BA32040
BA31746
BA29256
BA28434
BA28118
BA28088
BA27935
BA25665
BA25425
BA24831
BA24670
BA23183
BA20978
BA20567
BA18029
BA18015
BA17989
BA17341
BA12949
BA12818
BA11905
BA10835
BA10334
BA9344
BA6464
BA6378
BA6008
BA4656
BA4439
BA4393
BA4072
BA3635
BA2908
BA2817
BA2275
BA2105
BA1625
BA1602
BA1559
BA253
B35725
B32205
B20143
B20038
B16470
B-16340
B7868
B6753
B3789
B3639
B2481
B1647
AWD5
938
936
926
876
242CHI
231CHI
162CAM
86AS
80CAM
76CHI
61CAM
55DN
35DN
27CAM
8AS
4DN
EGD-HP19
